# Supplementary material for: Theoretical study of the mechanisms and kinetics of the reactions of hydroperoxy (HO2) radicals with hydroxymethylperoxy (HOCH2O2) and methoxymethylperoxy (CH3OCH2O2) radicals
Source: Royal Society of Chemistry journal article supplement (doi:10.1039/c4cp02747g), 2014-01-01
Supplement: c4cp02747g1.pdf [file c4cp02747g1.pdf]

## Supporting Information

### Theoretical Study of the Reactions of Hydroperoxy (HO<sub>2</sub>) with Hydroxymethylperoxy (HOCH<sub>2</sub>O<sub>2</sub>) and Methoxymethylperoxy (CH<sub>3</sub>OCH<sub>2</sub>O<sub>2</sub>)

Youxiang Shao, Hua Hou, and Baoshan Wang\*

*College of Chemistry and Molecular Sciences, Wuhan University, Wuhan, 430072, People's*

*Republic of China*

#### INDEX

|                |    |
|----------------|----|
| Table S1.....  | 2  |
| Table S2.....  | 3  |
| Table S3.....  | 4  |
| Table S4.....  | 5  |
| Table S5.....  | 18 |
| Figure S1..... | 24 |
| Figure S2..... | 25 |
| Figure S3..... | 26 |
| Figure S4..... | 27 |
| Figure S5..... | 28 |
| Figure S6..... | 29 |
| Figure S7..... | 30 |

**Table S1.** Zero-point energies (ZPE), relative energies ( $\Delta E$ ), and Gibbs free energies ( $\Delta G$ ) at 298.15 K for various product channels in the  $\text{HO}_2 + \text{HOCH}_2\text{O}_2$  reaction.

| Species                                                     | ZPE   | <sup>a</sup> $\Delta E_1$ | <sup>a</sup> $\Delta G_1$ | <sup>a</sup> $\Delta E_2$ | <sup>a</sup> $\Delta G_2$ | <sup>a</sup> $\Delta E_3$ | <sup>a</sup> $\Delta G_3$ | Exptl. <sup>b</sup> |
|-------------------------------------------------------------|-------|---------------------------|---------------------------|---------------------------|---------------------------|---------------------------|---------------------------|---------------------|
| $\text{HO}_2 + \text{HOCH}_2\text{O}_2(\text{cis})$         | 39.37 | 0                         | 0                         | 0                         |                           | 0                         |                           |                     |
| $\text{HO}_2 + \text{HOCH}_2\text{O}_2(\text{trans})$       | 39.13 | 1.68                      | -1.72                     | 1.77                      | -1.63                     | 1.71                      | -1.69                     |                     |
| $^3\text{O}_2 + \text{HOCH}_2\text{OOH (A)}$                | 40.41 | -34.54                    | -39.09                    | -38.59                    | -43.14                    | -38.74                    | -43.29                    | -40.3               |
| $\text{HOCHO}_2 + \text{H}_2\text{O}_2$                     | 38.46 | 16.93                     | 10.83                     | 14.13                     | 8.03                      | 14.09                     | 7.99                      |                     |
| $\text{CH}_2\text{O} + ^3\text{O}_2 + \text{H}_2\text{O}_2$ | 35.57 | -20.25                    | -34.64                    | -23.16                    | -37.55                    | -22.81                    | -37.2                     | -21.4               |
| $\text{CH}_2\text{O} + 2 \text{HO}_2$                       | 34.35 | 13.56                     | -2.53                     | 14.84                     | -1.25                     | 15.47                     | -0.62                     | 16.9                |
| $\text{HCOOH} + \text{HO}_3\text{H}$                        | 40.27 | -67.9                     | -91.25                    | -74.21                    | -97.56                    | -75.87                    | -99.22                    | -75.1               |
| $\text{HCOOH} + \text{OH} + \text{HO}_2$                    | 35.41 | -40.14                    | -54.86                    | -43.63                    | -58.35                    | -42.32                    | -57.04                    | -41.5               |
| $\text{HCOOH} + \text{H}_2\text{O} + ^1\text{O}_2$          | 36.94 | -66.91                    | -80.04                    | -82.63                    | -95.76                    | -83.67                    | -96.8                     | -88.6               |
| $\text{HCOOH} + \text{H}_2 + \text{O}_3$                    | 32.12 | -9.19                     | -21.49                    | -16.73                    | -29.03                    | -20.59                    | -32.89                    | -20.1               |
| $^1\text{O}_2 + \text{HOCH}_2\text{OOH (A)}$                | 40.39 | 4.46                      | 0.56                      | -8.78                     | -12.68                    | -10.41                    | -14.31                    |                     |
| $\text{CH}_2(\text{OH})_2 + \text{O}_3$                     | 40.29 | -3.51                     | -9.24                     | -16.74                    | -22.47                    | -16.49                    | -22.22                    |                     |
| $\text{CH}_2\text{O} + \text{H}_2\text{O} + \text{O}_3$     | 34.55 | 2.82                      | -11.4                     | -10.87                    | -25.09                    | -12.99                    | -27.21                    | -13.6               |
| $\text{HOCH}_2\text{O} + \text{OH} + ^3\text{O}_2$          | 33.39 | 4.34                      | -13.15                    | 0.92                      | -16.57                    | 4.98                      | -12.51                    | 3.8                 |

<sup>a</sup> Subscripts 1, 2, and 3 represent B3LYP/6-311G(d,p), CCSD(T)/CBS, and CBS-QB3 levels of theory, respectively. All energies are in kcal/mol.

<sup>b</sup> Experimental enthalpies of formation (ref 38) for various species are as follows (in kcal/mol):  $\text{HO}_2$  (3.64),  $\text{HOCH}_2\text{O}_2$  (-38.3),  $\text{HOCH}_2\text{OOH}$  (-75),  $\text{H}_2\text{O}_2$  (-31),  $\text{HCOOH}$  (-88.7),  $\text{H}_2\text{O}$  (-57.1),  $\text{OH}$  (8.9),  $\text{CH}_2\text{O}$  (-25.1),  $\text{HO}_3\text{H}$  (-21.1),  $\text{HO}_3$  (7.1),  $\text{O}_3$  (33.9),  $^1\text{O}_2$  (22.5),  $\text{HOCH}_2\text{O}$  (-39.8),  $\text{CH}_2(\text{OH})_2$  (-93.5).

**Table S2.** Zero-point energies (ZPE), relative energies ( $\Delta E$ ), and Gibbs free energy ( $\Delta G$ ) at 298.15 K for various conformations of the HOCH<sub>2</sub>O<sub>4</sub>H adducts and the isomerization transition states with respect to the HO<sub>2</sub> + HOCH<sub>2</sub>O<sub>2</sub> asymptote.

| Species        | ZPE   | <sup>a</sup> $\Delta E_1$ | <sup>a</sup> $\Delta G_1$ | <sup>a</sup> $\Delta E_2$ | <sup>a</sup> $\Delta G_2$ | <sup>a</sup> $\Delta E_3$ | <sup>a</sup> $\Delta G_3$ |
|----------------|-------|---------------------------|---------------------------|---------------------------|---------------------------|---------------------------|---------------------------|
| IM-S1A         | 41.94 | -6.91                     | -1.54                     | -13.42                    | -8.05                     | -12.42                    | -7.05                     |
| IM-S1B         | 42.23 | -8.76                     | -2.84                     | -14.72                    | -8.80                     | -13.71                    | -7.79                     |
| IM-S1C         | 42.24 | -9.18                     | -3.31                     | -15.13                    | -9.26                     | -14.22                    | -8.35                     |
| IM-S1D         | 42.02 | -7.24                     | -1.81                     | -14.11                    | -8.68                     | -13.09                    | -7.66                     |
| IM-S1E         | 42.14 | -6.15                     | -0.45                     | -12.85                    | -7.15                     | -12.02                    | -6.32                     |
| IM-S1F         | 42.01 | -6.88                     | -1.44                     | -12.86                    | -7.42                     | -11.96                    | -6.52                     |
| IM-S1G         | 42.16 | -7.74                     | -2.32                     | -14.18                    | -8.76                     | -13.29                    | -7.87                     |
| IM-S1H         | 41.94 | -5.91                     | -0.58                     | -12.65                    | -7.32                     | -11.51                    | -6.18                     |
| TS (S1A ↔ S1B) | 41.66 | -1.43                     | 4.86                      | -7.88                     | -1.59                     | -10.93                    | -4.64                     |
| TS (S1A ↔ S1D) | 41.30 | -3.08                     | 2.39                      | -10.17                    | -4.70                     | -12.42                    | -6.95                     |
| TS (S1A ↔ S1H) | 42.08 | -1.25                     | 4.65                      | -6.90                     | -1.00                     | -4.56                     | 1.34                      |
| TS (S1B ↔ S1G) | 41.81 | 0.11                      | 6.21                      | -5.63                     | 0.47                      | -7.29                     | -1.19                     |
| TS (S1C ↔ S1D) | 41.72 | -4.22                     | 1.83                      | -11.04                    | -4.99                     | -10.4                     | -4.35                     |
| TS (S1C ↔ S1F) | 42.04 | -1.75                     | 4.33                      | -6.49                     | -0.41                     | -5.94                     | 0.14                      |
| TS (S1D ↔ S1E) | 41.89 | -2.42                     | 8.21                      | -3.53                     | 7.10                      | -0.83                     | 9.80                      |
| TS (S1E ↔ S1F) | 41.15 | -3.39                     | 2.99                      | -9.15                     | -2.77                     | -12.01                    | -5.63                     |
| TS (S1F ↔ S1G) | 41.39 | -2.95                     | 2.55                      | -9.67                     | -4.17                     | -8.75                     | -3.25                     |
| TS (S1G ↔ S1H) | 41.70 | -4.30                     | 1.75                      | -11.19                    | -5.14                     | -10.51                    | -4.46                     |

<sup>a</sup> Subscripts 1, 2, and 3 represent B3LYP/6-311G(d,p), CCSD(T)/CBS, and CBS-QB3 levels of theory, respectively. All energies are in kcal/mol.

**Table S3.** Zero-point energies (ZPE), relative energies ( $\Delta E$ ), and Gibbs free energies ( $\Delta G$ ) at 298.15 K for various species involved in the  $\text{HO}_2 + \text{CH}_3\text{OCH}_2\text{O}_2$  reaction.

| Species                                                        | ZPE   | <sup>a</sup> $\Delta E_1$ | <sup>a</sup> $\Delta G_1$ | <sup>a</sup> $\Delta E_2$ | <sup>a</sup> $\Delta G_2$ | <sup>a</sup> $\Delta E_3$ | <sup>a</sup> $\Delta G_3$ |
|----------------------------------------------------------------|-------|---------------------------|---------------------------|---------------------------|---------------------------|---------------------------|---------------------------|
| $\text{HO}_2 + \text{CH}_3\text{OCH}_2\text{O}_2$              | 56.81 | 0                         | 0                         | 0                         | 0                         | 0                         | 0                         |
| IM-T1                                                          | 58.30 | -7.30                     | -1.91                     | -6.72                     | -1.33                     | -5.33                     | 0.06                      |
| IM-T2                                                          | 58.46 | -7.78                     | -2.09                     | -7.97                     | -2.28                     | -6.29                     | -0.60                     |
| TS-T1                                                          | 55.83 | -6.66                     | -1.15                     | 0.45                      | 5.96                      | 1.31                      | 6.82                      |
| TS-T2                                                          | 57.29 | -6.64                     | -0.38                     | -4.22                     | 2.04                      | -2.24                     | 4.02                      |
| TS-T3                                                          | 56.27 | 15.89                     | 21.09                     | 29.07                     | 34.27                     | 28.31                     | 33.51                     |
| IM-S1                                                          | 59.62 | -8.60                     | -0.02                     | -12.08                    | -3.50                     | -13.24                    | -4.66                     |
| TS-S1 <sup>b</sup>                                             | 59.76 | <i>n/a</i>                | <i>n/a</i>                | 44.08                     | <i>n/a</i>                | 40.23                     | <i>n/a</i>                |
| TS-S2                                                          | 54.76 | 34.62                     | 51.99                     | 19.23                     | 36.60                     | 21.43                     | 38.80                     |
| TS-S3                                                          | 55.51 | 18.76                     | 47.87                     | 14.93                     | 44.04                     | 13.23                     | 42.34                     |
| TS-S4                                                          | 55.67 | 7.77                      | 36.88                     | 4.58                      | 33.69                     | 2.62                      | 31.73                     |
| TS-S5                                                          | 55.75 | 16.56                     | 43.20                     | 11.29                     | 37.93                     | 9.11                      | 35.75                     |
| TS-S6                                                          | 52.32 | 34.59                     | 63.70                     | 31.58                     | 60.69                     | 32.83                     | 61.94                     |
| TS-S7                                                          | 56.19 | 11.87                     | 40.98                     | 12.92                     | 42.03                     | 13.32                     | 42.43                     |
| TS-S8                                                          | 57.56 | 25.24                     | 54.35                     | 9.02                      | 38.13                     | 10.56                     | 39.67                     |
| TS-S9                                                          | 57.36 | 14.47                     | 22.59                     | 8.02                      | 16.14                     | 8.33                      | 16.45                     |
| $\text{CH}_3\text{OCH}_2\text{O} + \text{HO}_3$                | 54.59 | 3.32                      | -1.03                     | 5.48                      | 1.13                      | 5.50                      | 1.15                      |
| $\text{CH}_3\text{OCH}_2\text{O} + \text{HO} + {}^3\text{O}_2$ | 51.19 | 2.99                      | -8.61                     | -1.33                     | -12.93                    | 6.46                      | -5.14                     |
| $\text{CH}_3\text{OCH}_2\text{OOH} + {}^3\text{O}_2$           | 57.56 | -33.58                    | -33.86                    | -38.55                    | -38.83                    | -36.16                    | -36.44                    |
| $\text{CH}_3\text{OCHO} + \text{HO}_3\text{H}$                 | 57.33 | -63.53                    | -84.85                    | -65.01                    | -86.33                    | -67.01                    | -88.33                    |
| $\text{CH}_3\text{OCHO} + \text{HO}_2 + \text{OH}$             | 52.47 | -35.77                    | -48.47                    | -39.10                    | -51.80                    | -38.30                    | -51.00                    |
| $\text{CH}_3\text{OCH}_2\text{OH} + \text{O}_3$                | 57.68 | -4.19                     | -7.32                     | -13.61                    | -16.74                    | -14.83                    | -17.96                    |
| $\text{CH}_3\text{OCHO} + \text{H}_2 + \text{O}_3$             | 49.18 | -4.82                     | -15.09                    | -13.52                    | -23.79                    | -14.81                    | -25.08                    |
| $\text{CH}_3\text{OH} + \text{CH}_2\text{O} + \text{O}_3$      | 53.26 | 4.64                      | -8.59                     | -5.36                     | -18.59                    | -8.19                     | -21.42                    |
| $\text{CH}_3\text{OCHO} + \text{H}_2\text{O} + {}^1\text{O}_2$ | 54.00 | -62.54                    | -73.65                    | -75.08                    | -86.19                    | -79.97                    | -91.08                    |

<sup>a</sup> Subscripts 1, 2, and 3 represent B3LYP/6-311G(d,p), CCSD(T)/cc-pVDZ, and CBS-QB3 levels of theory, respectively. All energies are in kcal/mol.

<sup>b</sup> Geometries and ZPE were calculated at the CISD/cc-pVDZ level of theory.

**Table S4.** Cartesian coordinates (in Ångstroms) of various stationary points optimized at the B3LYP/6-311G(d,p) level for the HO<sub>2</sub> + HOCH<sub>2</sub>O<sub>2</sub> reaction.

HOCH<sub>2</sub>O<sub>2</sub>, *cis*

|   |           |           |           |
|---|-----------|-----------|-----------|
| C | -0.616567 | 0.569924  | 0.238086  |
| O | 0.759162  | 0.536336  | -0.294575 |
| O | 1.366966  | -0.554776 | 0.127703  |
| O | -1.349965 | -0.511005 | -0.181482 |
| H | -0.504379 | 0.638338  | 1.325094  |
| H | -1.039024 | 1.476603  | -0.190253 |
| H | -0.966499 | -1.298926 | 0.223479  |

HOCH<sub>2</sub>O<sub>2</sub>, *trans*

|   |           |           |           |
|---|-----------|-----------|-----------|
| C | -0.496898 | 0.507707  | -0.045751 |
| O | 0.607323  | -0.466410 | -0.199112 |
| O | 1.759253  | 0.072663  | 0.142203  |
| O | -1.682853 | -0.181749 | -0.002149 |
| H | -0.251467 | 1.082898  | 0.851433  |
| H | -0.496557 | 1.132770  | -0.938239 |
| H | -1.740375 | -0.657937 | 0.833771  |

IM-T1:

|   |           |           |           |
|---|-----------|-----------|-----------|
| O | -1.126731 | 1.016451  | -0.099193 |
| C | -1.129109 | -0.420250 | 0.337235  |
| O | 0.076791  | 1.534715  | -0.132339 |
| H | 1.626722  | 0.638939  | 0.154325  |
| O | 2.435789  | 0.069146  | 0.191191  |
| O | 2.036854  | -1.119478 | -0.239183 |
| O | -2.326279 | -0.962357 | -0.034517 |
| H | -1.075624 | -0.396231 | 1.425237  |
| H | -0.238728 | -0.866468 | -0.113570 |
| H | -2.309115 | -1.162549 | -0.977073 |

TS-T1:

|   |           |           |           |
|---|-----------|-----------|-----------|
| O | -0.446874 | 0.162588  | 0.793231  |
| C | -1.337170 | -0.714585 | 0.003142  |
| O | -0.042223 | 1.181044  | 0.035978  |
| H | 1.451395  | 0.842783  | -0.146610 |
| O | 2.319313  | 0.323680  | -0.297718 |

|   |           |           |           |
|---|-----------|-----------|-----------|
| O | 2.055228  | -0.921185 | -0.016702 |
| H | -1.574424 | -1.517090 | 0.698020  |
| O | -2.491775 | -0.067765 | -0.353580 |
| H | -0.729846 | -1.057665 | -0.837832 |
| H | -2.273456 | 0.592588  | -1.022105 |

IM-T2:

|   |           |           |           |
|---|-----------|-----------|-----------|
| O | 0.624665  | -0.214540 | -0.324145 |
| C | 2.028845  | -0.292526 | 0.179403  |
| O | -0.128185 | -1.124242 | 0.250200  |
| H | -1.835484 | -0.634702 | -0.177579 |
| O | -2.711254 | -0.200614 | -0.307682 |
| O | -2.593165 | 0.981675  | 0.286838  |
| H | 2.493411  | -1.130811 | -0.337817 |
| O | 2.668796  | 0.858522  | -0.177766 |
| H | 1.931040  | -0.473979 | 1.252752  |
| H | 2.351109  | 1.588242  | 0.366673  |

TS-T2:

|   |           |           |           |
|---|-----------|-----------|-----------|
| O | -0.692904 | 0.448251  | -0.600351 |
| C | -1.936627 | 0.580987  | 0.166389  |
| O | 0.050081  | -0.530568 | -0.056742 |
| H | 1.344814  | -0.028878 | 0.237377  |
| O | 2.296430  | 0.326329  | 0.512763  |
| O | 3.142307  | -0.254828 | -0.272729 |
| H | -2.448566 | 1.403984  | -0.328719 |
| O | -2.716224 | -0.545177 | 0.082876  |
| H | -1.630661 | 0.836334  | 1.186271  |
| H | -2.283347 | -1.249426 | 0.580199  |

IM-T3:

|   |           |           |           |
|---|-----------|-----------|-----------|
| O | -1.982213 | -0.681643 | 0.042418  |
| O | -2.051143 | 0.637016  | 0.113219  |
| H | -1.116505 | 0.958705  | -0.010509 |
| O | 0.549313  | 1.449879  | -0.218761 |
| O | 1.625391  | 0.727663  | -0.031783 |
| C | 1.318567  | -0.665938 | 0.464298  |
| H | 2.324877  | -1.050288 | 0.622517  |
| H | 0.776742  | -0.509418 | 1.402445  |
| O | 0.659460  | -1.401460 | -0.459876 |

---

|   |           |           |           |
|---|-----------|-----------|-----------|
| H | -0.302980 | -1.255020 | -0.361970 |
|---|-----------|-----------|-----------|

---

TS-T3:

---

|   |           |           |           |
|---|-----------|-----------|-----------|
| O | 1.787602  | 0.917895  | 0.108525  |
| O | 1.995615  | -0.327477 | -0.116075 |
| H | 1.044116  | -0.880317 | 0.014608  |
| O | -0.085193 | -1.490324 | 0.219693  |
| O | -1.098790 | -0.891906 | -0.431727 |
| C | -1.578315 | 0.296509  | 0.306433  |
| H | -2.649387 | 0.300674  | 0.108396  |
| H | -1.343358 | 0.092777  | 1.355001  |
| O | -1.035285 | 1.445030  | -0.199627 |
| H | -0.093073 | 1.482061  | 0.037085  |

---

TS-T4:

---

|   |           |           |           |
|---|-----------|-----------|-----------|
| C | -0.731850 | 0.748981  | 0.493808  |
| O | -1.563281 | -0.436872 | 0.275416  |
| O | -0.929409 | -1.388816 | -0.389571 |
| H | -1.253836 | 1.336138  | 1.246679  |
| H | 0.500643  | 0.245206  | 0.937636  |
| H | 0.300239  | 0.968200  | -1.074165 |
| O | -0.431257 | 1.432606  | -0.615900 |
| O | 1.573339  | -0.155239 | 0.859712  |
| O | 1.778334  | -0.197962 | -0.542480 |
| H | 1.422239  | -1.073163 | -0.770414 |

---

TS-T5:

---

|   |           |           |           |
|---|-----------|-----------|-----------|
| C | -0.442958 | 0.480643  | 0.505639  |
| O | -1.510117 | -0.510973 | 0.647806  |
| O | -1.962171 | -0.857676 | -0.545913 |
| H | -0.179746 | 0.819736  | 1.506086  |
| H | 0.681718  | -0.260224 | 0.068249  |
| H | -1.168197 | 1.083577  | -1.115519 |
| O | -0.761202 | 1.485952  | -0.329135 |
| O | 1.619083  | -0.804521 | -0.254729 |
| O | 2.668988  | 0.058226  | 0.132656  |
| H | 2.887320  | 0.504991  | -0.698133 |

---

IM-T4:

|   |           |           |           |
|---|-----------|-----------|-----------|
| C | -1.196958 | 0.814100  | 0.442090  |
| O | -1.827771 | -0.393542 | -0.007269 |
| O | -1.021383 | -1.451275 | 0.066625  |
| H | -1.943365 | 1.447684  | 0.907431  |
| H | 2.051630  | 0.895384  | 0.681409  |
| H | 0.286394  | 0.778474  | -0.757656 |
| O | -0.390697 | 1.418859  | -0.434412 |
| O | 2.394363  | 0.001258  | 0.533469  |
| O | 1.570881  | -0.440336 | -0.576304 |
| H | 0.983949  | -1.085849 | -0.140607 |

IM-T5:

|   |           |           |           |
|---|-----------|-----------|-----------|
| C | -1.605035 | -0.589208 | 0.279285  |
| O | -1.633832 | 0.803843  | -0.234127 |
| O | -0.533762 | 1.442616  | 0.106040  |
| O | -0.714002 | -1.368702 | -0.398579 |
| H | -1.397589 | -0.489214 | 1.349154  |
| H | -2.618262 | -0.937298 | 0.082490  |
| H | 0.185108  | -1.149029 | -0.098060 |
| O | 1.782054  | -0.389134 | 0.590834  |
| O | 2.405738  | 0.171983  | -0.435491 |
| H | 3.011379  | 0.825938  | -0.038714 |

TS-T6:

|   |           |           |           |
|---|-----------|-----------|-----------|
| C | -1.491788 | -0.924216 | 0.209206  |
| O | -1.620782 | 0.932055  | -0.138103 |
| O | -0.478185 | 1.446762  | -0.034206 |
| O | -0.438915 | -1.324898 | -0.376235 |
| H | -1.487812 | -0.745007 | 1.287709  |
| H | -2.447794 | -1.183723 | -0.244117 |
| H | 0.477915  | -0.858454 | 0.091069  |
| O | 1.379770  | -0.120492 | 0.615739  |
| O | 2.349581  | 0.013966  | -0.362716 |
| H | 2.876671  | 0.753340  | -0.025740 |

TS-T7:

|   |           |           |           |
|---|-----------|-----------|-----------|
| C | -0.184010 | 0.425256  | 0.110156  |
| H | -0.203878 | 0.079580  | 1.128942  |
| O | -0.180022 | 1.736870  | -0.041157 |
| H | 0.047652  | -0.234408 | -0.708324 |



|   |           |           |           |
|---|-----------|-----------|-----------|
| O | -2.112786 | -0.025602 | -0.094495 |
| O | -2.365263 | -1.240140 | 0.059802  |
| O | 2.005129  | 0.127027  | 0.369407  |
| O | 2.473115  | -0.942853 | -0.349817 |
| H | 2.683049  | -1.608275 | 0.324719  |
| H | 0.015856  | 1.969154  | -0.956193 |

IM-T6:

|   |           |           |           |
|---|-----------|-----------|-----------|
| C | -1.130486 | 0.893863  | 0.241124  |
| O | -0.910076 | -0.506420 | -0.282110 |
| O | -1.819321 | -1.350404 | 0.157891  |
| O | -0.182781 | 1.688995  | -0.314783 |
| H | -2.121167 | 1.184515  | -0.102078 |
| H | -1.084468 | 0.783595  | 1.328756  |
| H | 0.687362  | 1.441000  | 0.048915  |
| O | 1.851378  | -0.988527 | -0.202999 |
| H | 0.887543  | -0.973988 | -0.422796 |
| O | 2.112506  | 0.181569  | 0.354558  |

TS-T8:

|   |           |           |           |
|---|-----------|-----------|-----------|
| C | -0.508557 | 1.515642  | 0.235616  |
| O | -1.060321 | -0.302553 | -0.338350 |
| O | -2.099303 | -0.918997 | 0.178882  |
| O | 0.650415  | 1.568647  | -0.250817 |
| H | -1.305738 | 2.076301  | -0.253164 |
| H | -0.678207 | 1.216846  | 1.274057  |
| H | 1.334081  | 0.627684  | 0.059369  |
| O | 1.078519  | -1.418217 | -0.081183 |
| H | -0.066234 | -0.941006 | -0.294130 |
| O | 1.901620  | -0.438090 | 0.216490  |

IM-S1C

|   |           |           |           |
|---|-----------|-----------|-----------|
| O | 0.552774  | -1.000317 | -0.475552 |
| C | 1.599541  | -0.214491 | 0.084920  |
| O | -0.560233 | -0.975865 | 0.476866  |
| O | -1.623647 | -0.330633 | -0.132253 |
| O | -1.460022 | 1.095149  | 0.012513  |
| H | -0.944238 | 1.301477  | -0.785719 |
| H | 1.774671  | -0.542547 | 1.114664  |
| H | 2.449208  | -0.464181 | -0.552248 |

---

|   |          |          |           |
|---|----------|----------|-----------|
| O | 1.386280 | 1.159676 | -0.003549 |
| H | 0.761907 | 1.408116 | 0.689581  |

---

TS-S1:

---

|   |           |           |           |
|---|-----------|-----------|-----------|
| O | 1.109160  | -0.798342 | 0.758357  |
| C | 1.704756  | -0.289607 | -0.263673 |
| O | -0.645163 | -0.429382 | -0.276126 |
| O | -1.916946 | -0.501654 | -0.234322 |
| O | -2.534261 | 0.784912  | 0.178364  |
| H | -1.777367 | 1.201754  | 0.626832  |
| H | 0.854541  | -0.221872 | -1.086006 |
| O | 2.265508  | 0.993919  | -0.163955 |
| H | 2.430404  | -0.956764 | -0.774013 |
| H | 2.037494  | 1.318897  | 0.716679  |

---

TS-S2:

---

|   |           |           |           |
|---|-----------|-----------|-----------|
| O | 0.967204  | -1.217957 | -0.310717 |
| C | 1.233779  | -0.221283 | 0.395884  |
| O | -1.178392 | -1.073921 | -0.311523 |
| O | -1.249733 | -0.150800 | 0.519758  |
| O | -1.357762 | 1.293052  | -0.149707 |
| H | -0.544924 | 1.275929  | -0.695700 |
| H | 0.100622  | -0.009212 | 0.930833  |
| H | 1.840193  | -0.352421 | 1.312605  |
| O | 1.502692  | 0.992307  | -0.283626 |
| H | 1.729373  | 1.671957  | 0.363483  |

---

TS-S3:

---

|   |           |           |           |
|---|-----------|-----------|-----------|
| O | 0.272556  | -0.889632 | 0.714612  |
| C | 1.225397  | 0.094545  | 0.511806  |
| O | -0.793539 | -0.818752 | -0.489587 |
| O | -1.868476 | -0.387254 | -0.101708 |
| O | -0.794974 | 1.482624  | 0.098910  |
| H | -0.942752 | 2.444740  | 0.060364  |
| H | 0.536274  | 1.084264  | 0.549757  |
| H | 1.925617  | 0.028673  | 1.350349  |
| O | 1.915331  | 0.070444  | -0.677045 |
| H | 1.281294  | 0.215613  | -1.392761 |

---

TS-S4:

|   |           |           |           |
|---|-----------|-----------|-----------|
| O | 0.789934  | 0.921650  | 0.590162  |
| C | 1.114511  | -0.068835 | -0.060722 |
| O | -1.429213 | 1.076220  | -0.115359 |
| O | -1.487078 | -0.090837 | -0.573322 |
| O | -1.545892 | -1.093706 | 0.403233  |
| H | -0.473013 | -1.276692 | 0.708852  |
| H | 0.588327  | -1.288351 | 0.714799  |
| H | 0.436262  | -0.440161 | -0.867528 |
| O | 2.396057  | -0.403569 | -0.354236 |
| H | 2.970897  | 0.140154  | 0.204384  |

TS-S5:

|   |           |           |           |
|---|-----------|-----------|-----------|
| O | -0.495886 | -0.532742 | -0.618947 |
| C | -1.694734 | -0.524971 | 0.144989  |
| O | 0.387508  | 0.306568  | 0.005782  |
| O | 1.800000  | -0.394277 | 0.566089  |
| O | 2.494258  | 0.370471  | -0.240341 |
| H | 1.268105  | 0.644749  | -0.636092 |
| O | -2.365737 | 0.664732  | 0.074603  |
| H | -2.293400 | -1.295027 | -0.340639 |
| H | -1.441401 | -0.815405 | 1.170353  |
| H | -1.926050 | 1.297495  | 0.638956  |

TS-S6:

|   |           |           |           |
|---|-----------|-----------|-----------|
| O | 0.385198  | -0.859901 | -0.677177 |
| C | 1.319773  | -0.562046 | 0.307248  |
| O | -1.512644 | -0.843122 | 0.099360  |
| O | -1.424573 | 0.337274  | 0.559130  |
| O | -0.900780 | 1.148466  | -0.451770 |
| H | -0.227578 | 0.297766  | -0.856443 |
| H | 2.098411  | -1.332462 | 0.269982  |
| O | 1.953788  | 0.671184  | 0.101792  |
| H | 0.831723  | -0.606790 | 1.297685  |
| H | 1.370902  | 1.382548  | 0.394616  |

TS-S7:

|   |           |           |           |
|---|-----------|-----------|-----------|
| O | 0.960899  | -1.209386 | -0.350294 |
| C | 1.355939  | -0.318335 | 0.442126  |
| O | -1.017279 | -1.106202 | -0.259980 |
| O | -1.338934 | -0.131419 | 0.480155  |

|   |           |           |           |
|---|-----------|-----------|-----------|
| O | -1.303861 | 1.097629  | -0.162090 |
| H | -0.015342 | 1.263978  | -0.335505 |
| O | 1.109977  | 1.236501  | -0.281539 |
| H | 0.768595  | -0.141490 | 1.361527  |
| H | 2.441971  | -0.248908 | 0.586187  |
| H | 1.382724  | 1.939450  | 0.325017  |

TS-S8:

|   |           |           |           |
|---|-----------|-----------|-----------|
| O | 0.300650  | -1.372521 | -0.320194 |
| C | 1.593010  | -0.193784 | 0.279548  |
| O | -0.850894 | -1.029480 | 0.355369  |
| O | -1.568200 | -0.183890 | -0.258568 |
| O | -0.873252 | 1.558196  | 0.017810  |
| H | -1.124006 | 1.724685  | 0.938212  |
| H | 1.326973  | -0.339821 | 1.335499  |
| H | 2.397598  | -0.836720 | -0.087183 |
| O | 1.438343  | 0.934705  | -0.268731 |
| H | 0.268196  | 1.358472  | -0.069302 |

TS-S9:

|   |           |           |           |
|---|-----------|-----------|-----------|
| O | -0.854623 | -1.129822 | -0.397512 |
| O | -1.687050 | -0.613245 | 0.465400  |
| H | -1.756412 | 0.411429  | 0.151719  |
| O | -0.789453 | 1.409040  | -0.010538 |
| O | 0.163611  | 0.679356  | -0.582854 |
| C | 1.262079  | 0.390670  | 0.408836  |
| H | 1.914003  | 1.263085  | 0.381926  |
| H | 0.733308  | 0.292612  | 1.360681  |
| O | 1.942308  | -0.702064 | -0.022071 |
| H | 1.338291  | -1.457264 | 0.033251  |

TS-S10:

|   |           |           |           |
|---|-----------|-----------|-----------|
| O | 0.766312  | 0.593302  | -0.391203 |
| C | 1.555920  | -0.345005 | 0.408595  |
| O | -0.343157 | 0.933457  | 0.293955  |
| H | -1.611964 | 0.544862  | -0.645816 |
| O | -1.895340 | -0.381382 | -0.394052 |
| O | -3.015584 | -0.347939 | 0.239706  |
| H | 1.040276  | -1.306476 | 0.384119  |
| O | 2.783484  | -0.491385 | -0.191724 |

---

|   |          |          |           |
|---|----------|----------|-----------|
| H | 1.578423 | 0.065746 | 1.423195  |
| H | 3.292025 | 0.317478 | -0.066524 |

---

IM-S2:

---

|   |           |           |           |
|---|-----------|-----------|-----------|
| C | -1.129161 | 0.895140  | 0.241254  |
| O | -0.909478 | -0.507008 | -0.276594 |
| O | -1.827069 | -1.346409 | 0.154465  |
| O | -0.180275 | 1.687493  | -0.316713 |
| H | -2.119356 | 1.185373  | -0.103636 |
| H | -1.083897 | 0.788952  | 1.329365  |
| H | 0.689524  | 1.439682  | 0.047933  |
| O | 1.852364  | -0.990245 | -0.202703 |
| H | 0.888354  | -0.975668 | -0.421341 |
| O | 2.114501  | 0.180022  | 0.354064  |

---

TS-S11:

---

|   |           |           |           |
|---|-----------|-----------|-----------|
| C | -0.497348 | 1.523179  | 0.239738  |
| O | -1.057353 | -0.300127 | -0.310698 |
| O | -2.121640 | -0.911049 | 0.155843  |
| O | 0.655702  | 1.564188  | -0.261162 |
| H | -1.297953 | 2.081957  | -0.245713 |
| H | -0.656032 | 1.235633  | 1.283105  |
| H | 1.339082  | 0.620886  | 0.047518  |
| O | 1.076765  | -1.424906 | -0.074389 |
| H | -0.065027 | -0.948863 | -0.272233 |
| O | 1.904529  | -0.444191 | 0.209018  |

---

HOCH2OOH-A:

---

|   |           |           |           |
|---|-----------|-----------|-----------|
| O | -1.357649 | -0.600551 | -0.020301 |
| C | -0.612532 | 0.550405  | 0.287346  |
| H | -1.656166 | -0.528191 | -0.933924 |
| H | -0.449893 | 0.533299  | 1.365604  |
| H | -1.105899 | 1.476803  | -0.029949 |
| O | 0.618659  | 0.593386  | -0.393503 |
| O | 1.466491  | -0.436312 | 0.173237  |
| H | 1.067138  | -1.236525 | -0.201261 |

---

HOCH2OOH-D:

---

|   |          |          |           |
|---|----------|----------|-----------|
| C | 0.525199 | 0.499093 | -0.031820 |
|---|----------|----------|-----------|

---

|   |           |           |           |
|---|-----------|-----------|-----------|
| O | -0.467806 | -0.534265 | -0.122059 |
| O | -1.739194 | 0.099478  | 0.178844  |
| O | 1.758234  | -0.132795 | -0.039066 |
| H | 0.485885  | 1.147160  | -0.912453 |
| H | 0.325101  | 1.077506  | 0.878763  |
| H | 1.815818  | -0.677510 | 0.754373  |
| H | -2.187872 | -0.001063 | -0.671509 |

---

SR1-TS1:

|   |           |           |           |
|---|-----------|-----------|-----------|
| C | 0.671334  | -0.621619 | 0.535686  |
| O | 1.021728  | 0.703122  | 0.739359  |
| O | 1.009539  | 1.343419  | -0.578479 |
| H | 0.664020  | -1.083885 | 1.523027  |
| H | -0.617925 | -0.649223 | 0.091121  |
| H | 1.431595  | -0.853112 | -1.183967 |
| O | 1.445069  | -1.330224 | -0.343273 |
| O | -1.723020 | -0.722548 | -0.308639 |
| O | -2.316605 | 0.519863  | -0.004117 |
| H | 1.806613  | 1.884419  | -0.490444 |
| H | -2.805991 | 0.322454  | 0.807335  |

---

SR1-TS2:

|   |           |           |           |
|---|-----------|-----------|-----------|
| C | -0.395236 | 0.505540  | 0.507095  |
| O | -1.506515 | -0.278265 | 0.751952  |
| O | -1.872047 | -0.876576 | -0.540304 |
| H | -0.076296 | 0.901950  | 1.471310  |
| H | 0.632970  | -0.291316 | 0.133936  |
| H | -0.938322 | 1.092451  | -1.208874 |
| O | -0.549607 | 1.501265  | -0.423544 |
| O | 1.607278  | -0.877224 | -0.199863 |
| O | 2.664857  | -0.000909 | 0.123562  |
| H | -2.829683 | -0.929509 | -0.414877 |
| H | 2.831020  | 0.446853  | -0.718482 |

---

SR1-TS3:

|   |          |           |           |
|---|----------|-----------|-----------|
| C | 1.300675 | -0.694996 | -0.111749 |
| O | 0.440282 | 0.032060  | 0.804076  |
| O | 0.025048 | 1.187905  | 0.175157  |
| O | 2.501497 | -0.049028 | -0.319231 |
| H | 1.497613 | -1.630432 | 0.410680  |
| H | 0.723289 | -0.851699 | -1.027537 |

---

|   |           |           |           |
|---|-----------|-----------|-----------|
| H | 2.321926  | 0.747939  | -0.831841 |
| H | -1.086318 | 0.935597  | -0.135038 |
| O | -2.121366 | 0.439778  | -0.434308 |
| O | -1.980913 | -0.880161 | -0.055889 |
| H | -2.176941 | -0.875863 | 0.895793  |

SR1-TS4:

|   |           |           |           |
|---|-----------|-----------|-----------|
| C | -1.860454 | -0.430946 | 0.436394  |
| O | -0.855808 | -0.677248 | -0.566880 |
| O | 0.036372  | 0.379646  | -0.534917 |
| O | -2.642811 | 0.671834  | 0.151073  |
| H | -2.490025 | -1.319161 | 0.394971  |
| H | -1.335324 | -0.349742 | 1.395677  |
| H | -2.079616 | 1.451954  | 0.216809  |
| H | 1.077067  | -0.118697 | -0.292096 |
| O | 2.032023  | -0.516437 | 0.277136  |
| O | 3.015463  | 0.423082  | 0.018415  |
| H | 3.308700  | 0.674302  | 0.907657  |

SR1-TS5:

|   |           |           |           |
|---|-----------|-----------|-----------|
| C | 0.988686  | -0.220862 | 0.416804  |
| O | 0.925336  | 0.905045  | -0.404897 |
| O | -0.059220 | 1.800673  | 0.162448  |
| H | 1.156220  | 0.020305  | 1.469958  |
| H | -0.187588 | -0.776706 | 0.327684  |
| H | 1.797339  | -1.206309 | -0.999962 |
| O | 1.933316  | -1.082326 | -0.050864 |
| O | -1.302071 | -1.251609 | 0.012254  |
| O | -2.142732 | -0.125569 | -0.186021 |
| H | -0.881038 | 1.416118  | -0.197778 |
| H | -2.654083 | -0.097952 | 0.635913  |

SR1-TS6:

|   |           |           |           |
|---|-----------|-----------|-----------|
| C | 0.866778  | -0.415892 | 0.379468  |
| O | 1.279217  | 0.774677  | -0.210337 |
| O | 0.323378  | 1.796505  | 0.146304  |
| H | 0.732416  | -0.357731 | 1.463736  |
| H | -0.364637 | -0.555949 | -0.112503 |
| H | 1.923821  | -1.342104 | -0.906802 |
| O | 1.704317  | -1.430036 | 0.030620  |

|   |           |           |           |
|---|-----------|-----------|-----------|
| O | -1.428014 | -0.270002 | -0.659782 |
| O | -2.408631 | -0.311895 | 0.362238  |
| H | -0.474606 | 1.476054  | -0.324263 |
| H | -2.779797 | -1.198906 | 0.250680  |

SR1-TS7:

|   |           |            |           |
|---|-----------|------------|-----------|
| C | -1.380596 | 0.02184500 | 0.516987  |
| O | -0.487604 | 0.48112700 | -0.549589 |
| O | 0.369101  | 1.428118   | -0.035274 |
| O | -2.366099 | -0.738519  | -0.071249 |
| H | -0.807724 | -0.615500  | 1.188937  |
| H | -1.737097 | 0.923840   | 1.024041  |
| H | -2.946217 | -0.157871  | -0.576204 |
| H | 1.373089  | 0.835109   | 0.091678  |
| O | 2.237403  | 0.020237   | 0.217987  |
| O | 1.600977  | -1.176898  | -0.039525 |
| H | 1.571299  | -1.229171  | -1.009184 |

SR1-TS8:

|   |           |           |           |
|---|-----------|-----------|-----------|
| C | -1.761845 | -0.173387 | 0.498528  |
| O | -0.857545 | 0.354224  | -0.509939 |
| O | 0.245672  | 0.877910  | 0.131837  |
| O | -2.963082 | -0.449352 | -0.117287 |
| H | -1.349368 | -1.112449 | 0.873280  |
| H | -1.816500 | 0.576633  | 1.295257  |
| H | -3.373317 | 0.382559  | -0.379094 |
| H | 1.143272  | 0.226318  | -0.232924 |
| O | 1.992350  | -0.608266 | -0.307630 |
| O | 3.149321  | 0.015145  | 0.126865  |
| H | 3.433258  | -0.550023 | 0.861541  |

SR2-TS1:

|   |           |           |           |
|---|-----------|-----------|-----------|
| C | -0.385677 | 0.553050  | 0.408252  |
| O | -1.203394 | -0.467046 | 0.794307  |
| O | -1.753586 | -1.047100 | -0.457830 |
| H | 0.174228  | 0.903890  | 1.274381  |
| H | 0.894022  | -0.065562 | -0.315854 |
| H | -1.513539 | 1.135242  | -0.990607 |
| O | -0.928992 | 1.549619  | -0.339993 |
| O | 1.861471  | -0.418597 | -0.619545 |



|   |           |           |           |
|---|-----------|-----------|-----------|
| O | 2.691090  | -0.101313 | 0.333253  |
| H | -2.573362 | -1.416373 | -0.098980 |

SR2-TS2:

|   |           |           |           |
|---|-----------|-----------|-----------|
| C | 0.986295  | -0.224658 | 0.398974  |
| O | 0.823576  | 0.880791  | -0.413106 |
| O | -0.114307 | 1.772196  | 0.232260  |
| H | 1.146846  | -0.000182 | 1.455469  |
| H | -0.414457 | -0.872757 | 0.363945  |
| H | 1.844667  | -1.081029 | -1.071450 |
| O | 1.915231  | -1.071446 | -0.106942 |
| O | -1.465186 | -1.185516 | 0.195711  |
| O | -2.101162 | -0.156469 | -0.290806 |
| H | -0.960040 | 1.385463  | -0.078745 |

SR2-TS3:

|   |           |           |           |
|---|-----------|-----------|-----------|
| C | 0.800142  | -0.464107 | 0.364800  |
| O | 1.352634  | 0.643136  | -0.268715 |
| O | 0.627947  | 1.809766  | 0.172215  |
| H | 0.632183  | -0.346491 | 1.436448  |
| H | -0.758600 | -0.453436 | -0.196178 |
| H | 1.722971  | -1.570328 | -0.883875 |
| O | 1.486612  | -1.587659 | 0.053270  |
| O | -1.713027 | -0.268329 | -0.605154 |
| O | -2.553801 | -0.193983 | 0.399875  |
| H | -0.000323 | 1.931454  | -0.557123 |

SR3-TS1:

|   |           |           |           |
|---|-----------|-----------|-----------|
| C | -0.542619 | 0.273079  | 0.416970  |
| O | 0.276358  | 0.900349  | -0.356866 |
| O | 1.604436  | -0.459232 | 0.047411  |
| H | 0.289643  | -0.450111 | 0.930885  |
| H | -0.940411 | 0.850761  | 1.267387  |
| H | 2.536510  | -0.662684 | -0.173989 |
| O | -1.549212 | -0.521651 | -0.127307 |
| H | -1.282683 | -0.732168 | -1.032008 |

**Table S5.** Cartesian coordinates (in Ångstroms) of various stationary points optimized at the B3LYP/6-311G(d,p) level for the HO<sub>2</sub> + CH<sub>3</sub>OCH<sub>2</sub>O<sub>2</sub> reaction.

| CH <sub>3</sub> OCH <sub>2</sub> O <sub>2</sub> |           |           |           |
|-------------------------------------------------|-----------|-----------|-----------|
| O                                               | 1.232288  | 0.291426  | -0.377583 |
| C                                               | 0.101258  | 0.903207  | 0.334241  |
| O                                               | 1.538690  | -0.891933 | 0.126622  |
| O                                               | -1.099773 | 0.576770  | -0.240881 |
| H                                               | 0.255800  | 1.973286  | 0.204043  |
| H                                               | 0.194563  | 0.576186  | 1.375671  |
| C                                               | -1.558982 | -0.753289 | 0.018479  |
| H                                               | -1.587354 | -0.951084 | 1.096304  |
| H                                               | -2.565737 | -0.811267 | -0.392078 |
| H                                               | -0.920562 | -1.496739 | -0.465528 |

| IM-T1 |           |           |           |
|-------|-----------|-----------|-----------|
| O     | -0.544440 | 1.334240  | -0.055248 |
| C     | -0.720611 | 0.030497  | 0.680522  |
| O     | 0.702277  | 1.573211  | -0.380132 |
| H     | 2.100557  | 0.466477  | -0.076029 |
| O     | 2.812146  | -0.216523 | 0.014098  |
| O     | 2.182791  | -1.380352 | -0.070712 |
| O     | -2.030883 | -0.315672 | 0.605845  |
| H     | -0.467507 | 0.245446  | 1.718655  |
| H     | -0.019588 | -0.667868 | 0.210743  |
| C     | -2.434952 | -0.862302 | -0.657567 |
| H     | -1.817960 | -1.729525 | -0.916107 |
| H     | -3.470932 | -1.172280 | -0.537910 |
| H     | -2.366315 | -0.110646 | -1.447896 |

| IM-T2 |           |           |           |
|-------|-----------|-----------|-----------|
| O     | 0.444966  | -1.192268 | -0.389190 |
| C     | 1.823025  | -0.710957 | -0.090921 |
| O     | -0.315487 | -1.158790 | 0.686615  |
| H     | -1.986114 | -0.732109 | 0.150461  |
| O     | -2.783040 | -0.211531 | -0.115718 |
| O     | -2.364213 | 1.044288  | -0.197739 |
| H     | 2.458895  | -1.323740 | -0.727461 |
| O     | 1.962077  | 0.590329  | -0.461914 |
| H     | 1.958828  | -0.900253 | 0.979330  |
| C     | 1.283286  | 1.543540  | 0.374094  |

|   |          |          |          |
|---|----------|----------|----------|
| H | 1.613425 | 2.523617 | 0.035820 |
| H | 0.199048 | 1.461040 | 0.263001 |
| H | 1.563635 | 1.399720 | 1.423388 |

TS-T1

|   |           |           |           |
|---|-----------|-----------|-----------|
| O | 0.210295  | -0.709565 | -0.494556 |
| C | 1.440824  | -0.963461 | 0.257675  |
| O | -0.446940 | 0.351382  | 0.014047  |
| H | -1.789451 | -0.001416 | 0.231421  |
| O | -2.794352 | -0.244060 | 0.453605  |
| O | -3.525016 | 0.500128  | -0.308180 |
| H | 1.636503  | -2.018969 | 0.073805  |
| O | 2.500353  | -0.245514 | -0.230786 |
| H | 1.206339  | -0.745794 | 1.305623  |
| C | 2.520224  | 1.141503  | 0.123712  |
| H | 3.478100  | 1.527186  | -0.221081 |
| H | 1.706573  | 1.686812  | -0.360992 |
| H | 2.440928  | 1.264955  | 1.209869  |

TS-T2

|   |           |           |           |
|---|-----------|-----------|-----------|
| O | 0.031697  | 0.298454  | -0.556029 |
| C | 0.797770  | -0.643636 | 0.285673  |
| O | -0.541896 | 1.245174  | 0.180503  |
| H | -2.058649 | 0.812798  | 0.109206  |
| O | -2.899017 | 0.243962  | 0.086035  |
| O | -2.509801 | -0.975707 | -0.174056 |
| H | 0.875136  | -1.518847 | -0.369398 |
| O | 2.006042  | -0.128770 | 0.665267  |
| H | 0.199804  | -0.828951 | 1.174111  |
| C | 2.969828  | -0.017742 | -0.386369 |
| H | 3.900902  | 0.293544  | 0.083167  |
| H | 3.115759  | -0.984716 | -0.882822 |
| H | 2.665271  | 0.729530  | -1.123840 |

TS-T3

|   |           |           |           |
|---|-----------|-----------|-----------|
| C | 0.217180  | 0.009696  | -0.382907 |
| H | 0.242116  | -0.604927 | -1.267321 |
| O | 0.169026  | 1.300019  | -0.594163 |
| H | -0.000865 | -0.403884 | 0.588982  |
| O | 2.164535  | -0.309224 | -0.049223 |

|   |           |           |           |
|---|-----------|-----------|-----------|
| O | 2.436766  | -1.489276 | 0.264609  |
| O | -2.008815 | -0.363164 | -0.476514 |
| O | -2.467196 | -1.217250 | 0.493221  |
| H | -2.662411 | -2.037797 | 0.012980  |
| C | -0.114678 | 2.111269  | 0.562092  |
| H | 0.654010  | 1.959080  | 1.323275  |
| H | -0.099717 | 3.142776  | 0.219163  |
| H | -1.102670 | 1.850124  | 0.944380  |

TS-S1

|   |           |           |           |
|---|-----------|-----------|-----------|
| O | -0.036614 | 0.245987  | 0.687115  |
| C | -1.123097 | 0.934358  | 0.084177  |
| O | 0.835082  | -0.120680 | -0.306189 |
| O | 2.346052  | 0.490498  | -0.118030 |
| O | 2.842288  | -0.720218 | 0.039407  |
| H | 1.516468  | -0.958949 | -0.008792 |
| O | -1.941898 | 0.119418  | -0.638744 |
| H | -1.616638 | 1.380056  | 0.955664  |
| H | -0.731713 | 1.699293  | -0.585985 |
| C | -2.686076 | -0.791297 | 0.138944  |
| H | -3.309503 | -0.262148 | 0.871279  |
| H | -3.328974 | -1.342843 | -0.546585 |
| H | -2.033880 | -1.493819 | 0.667219  |

TS-S2

|   |           |           |           |
|---|-----------|-----------|-----------|
| O | 0.180781  | -1.240576 | -0.387061 |
| C | -0.755826 | -0.390747 | -0.937348 |
| O | 1.083788  | -0.524651 | 0.805398  |
| O | 2.160293  | -0.149743 | 0.392807  |
| O | 1.028806  | 1.392105  | -0.604708 |
| H | 1.088804  | 2.304504  | -0.941517 |
| H | -0.131959 | 0.620960  | -1.091249 |
| H | -1.022107 | -0.831240 | -1.905150 |
| O | -1.914818 | -0.143485 | -0.242359 |
| C | -1.756187 | 0.561414  | 0.990921  |
| H | -2.759567 | 0.773974  | 1.354402  |
| H | -1.216266 | -0.049545 | 1.722141  |
| H | -1.197628 | 1.488140  | 0.827314  |

TS-S3

|   |          |          |           |
|---|----------|----------|-----------|
| O | 0.352396 | 1.503618 | -0.534772 |
|---|----------|----------|-----------|

|   |           |           |           |
|---|-----------|-----------|-----------|
| C | 1.157503  | 0.778916  | 0.146024  |
| O | -1.137228 | 0.430328  | 0.444792  |
| O | -2.363548 | 0.075134  | 0.454995  |
| O | -2.587153 | -1.097121 | -0.424425 |
| H | -1.860242 | -0.971069 | -1.061280 |
| H | 0.443025  | 0.271387  | 0.965192  |
| O | 1.790830  | -0.268801 | -0.536542 |
| H | 1.868707  | 1.336988  | 0.797377  |
| C | 2.610729  | -1.086900 | 0.287342  |
| H | 2.017060  | -1.636457 | 1.029094  |
| H | 3.103190  | -1.800379 | -0.371205 |
| H | 3.376495  | -0.497825 | 0.808237  |

---

TS-S4

|   |           |           |           |
|---|-----------|-----------|-----------|
| O | -0.334189 | -1.675400 | -0.280139 |
| C | 0.533418  | -0.977476 | 0.293538  |
| O | -2.007951 | -0.332789 | -0.138870 |
| O | -1.439641 | 0.518333  | 0.566659  |
| O | -0.790679 | 1.707740  | -0.286079 |
| H | -0.223650 | 1.177460  | -0.882745 |
| H | -0.202724 | -0.121174 | 0.873619  |
| H | 1.060531  | -1.381853 | 1.181226  |
| O | 1.367505  | -0.180820 | -0.516664 |
| C | 2.336977  | 0.587644  | 0.201405  |
| H | 2.937641  | -0.048830 | 0.860022  |
| H | 2.987564  | 1.036614  | -0.546799 |
| H | 1.857914  | 1.380261  | 0.785767  |

---

TS-S5

|   |           |           |           |
|---|-----------|-----------|-----------|
| O | -0.367059 | 1.266186  | 0.452468  |
| C | 0.769553  | 1.055135  | -0.271133 |
| O | -2.056872 | 0.338499  | -0.454034 |
| O | -1.518750 | -0.808741 | -0.458151 |
| O | -0.967634 | -1.043734 | 0.799218  |
| H | -0.645811 | 0.024453  | 0.945934  |
| H | 1.254816  | 2.033006  | -0.433242 |
| O | 1.662774  | 0.207489  | 0.414758  |
| H | 0.529446  | 0.627519  | -1.265631 |
| C | 2.197217  | -0.870462 | -0.345575 |
| H | 2.783768  | -0.507692 | -1.199002 |
| H | 2.853184  | -1.426934 | 0.322315  |
| H | 1.404311  | -1.535984 | -0.704204 |

---

## TS-S6

---

|   |           |           |           |
|---|-----------|-----------|-----------|
| O | 0.378643  | 0.882202  | 0.493160  |
| C | 0.614987  | -0.139009 | -0.148125 |
| O | -1.890886 | 1.112197  | -0.099862 |
| O | -2.011216 | -0.062518 | -0.530021 |
| O | -2.066496 | -1.043117 | 0.472020  |
| H | -0.994539 | -1.259122 | 0.733867  |
| H | 0.071940  | -1.313257 | 0.683653  |
| H | -0.131304 | -0.491283 | -0.904924 |
| O | 1.844658  | -0.566964 | -0.508490 |
| C | 2.944162  | 0.096127  | 0.144357  |
| H | 2.828269  | 0.046536  | 1.229583  |
| H | 3.835271  | -0.441147 | -0.170606 |
| H | 2.997842  | 1.141161  | -0.163424 |

---

## TS-S7

---

|   |           |           |           |
|---|-----------|-----------|-----------|
| O | 0.647952  | 1.624574  | -0.302029 |
| C | -0.364959 | 1.260624  | 0.353856  |
| O | 1.933278  | 0.125333  | -0.099348 |
| O | 1.357150  | -0.820015 | 0.515016  |
| O | 0.543850  | -1.599317 | -0.291133 |
| H | -0.449711 | -0.731371 | -0.556668 |
| O | -1.217123 | 0.060006  | -0.505160 |
| H | -0.201727 | 0.685903  | 1.285928  |
| H | -1.172979 | 2.000273  | 0.434166  |
| C | -2.358606 | -0.470027 | 0.187441  |
| H | -3.138680 | 0.291344  | 0.213015  |
| H | -2.718786 | -1.335986 | -0.367860 |
| H | -2.097586 | -0.778400 | 1.204869  |

---

## TS-S8

---

|   |           |           |           |
|---|-----------|-----------|-----------|
| O | 0.274768  | 0.482452  | -0.394633 |
| C | 0.996017  | -0.529752 | 0.388093  |
| O | -0.804773 | 0.890794  | 0.297876  |
| H | -2.101172 | 0.590999  | -0.636812 |
| O | -2.442322 | -0.317758 | -0.393981 |
| O | -3.556996 | -0.218828 | 0.244365  |
| H | 0.409903  | -1.449344 | 0.338567  |
| O | 2.210463  | -0.749484 | -0.198384 |
| H | 1.049013  | -0.139872 | 1.412127  |
| C | 3.161688  | 0.301346  | -0.002039 |
| H | 3.318889  | 0.485726  | 1.067461  |

---

|   |          |           |           |
|---|----------|-----------|-----------|
| H | 4.092500 | -0.039016 | -0.451943 |
| H | 2.835520 | 1.224541  | -0.487664 |

TS-S9

|   |           |           |           |
|---|-----------|-----------|-----------|
| O | -1.492349 | -1.132942 | -0.403748 |
| O | -2.377381 | -0.447607 | 0.260802  |
| H | -2.270808 | 0.527952  | -0.131660 |
| O | -1.117437 | 1.391654  | -0.133704 |
| O | -0.185055 | 0.484449  | -0.447053 |
| C | 0.689164  | 0.253796  | 0.749641  |
| H | 1.044774  | 1.256815  | 1.011511  |
| H | 0.045330  | -0.171502 | 1.516770  |
| O | 1.666140  | -0.625764 | 0.416535  |
| C | 2.698073  | -0.094819 | -0.423748 |
| H | 3.137949  | 0.803344  | 0.025434  |
| H | 3.456703  | -0.870906 | -0.502528 |
| H | 2.311289  | 0.142114  | -1.417549 |

CH<sub>3</sub>OCH<sub>2</sub>OOH

|   |           |           |           |
|---|-----------|-----------|-----------|
| O | 1.187595  | 0.464611  | -0.358824 |
| C | 0.039911  | 0.920480  | 0.332738  |
| O | 1.450710  | -0.909486 | 0.061505  |
| H | 2.384928  | -0.829449 | 0.295690  |
| H | 0.109125  | 2.006146  | 0.235353  |
| O | -1.173435 | 0.552500  | -0.230075 |
| H | 0.115402  | 0.601889  | 1.381668  |
| C | -1.578309 | -0.792879 | 0.014031  |
| H | -2.608196 | -0.873005 | -0.333263 |
| H | -0.950494 | -1.505205 | -0.526886 |
| H | -1.539342 | -1.026990 | 1.085981  |

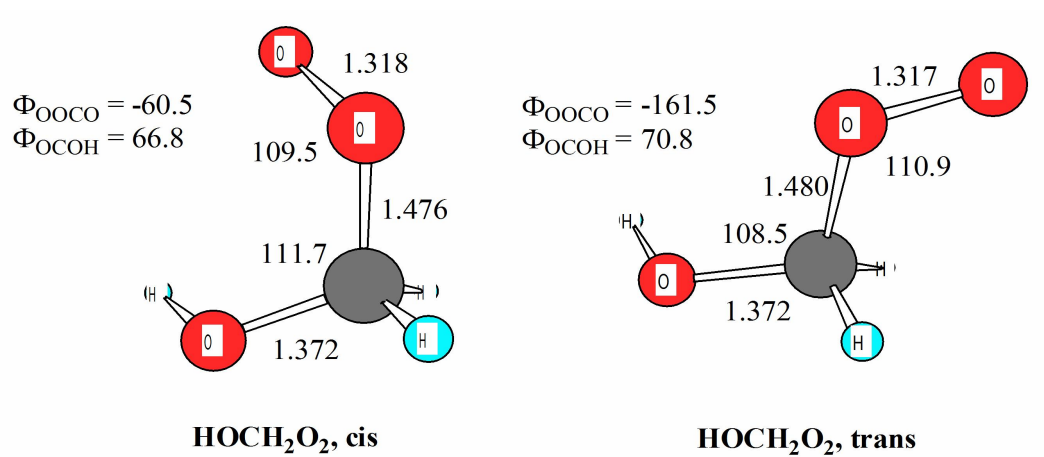

**Figure S1.** The B3LYP/6-311G(d,p) optimized geometries of two conformations of the HOCH<sub>2</sub>O<sub>2</sub> radical. Bond distances are in Å and bond angles are in degrees.



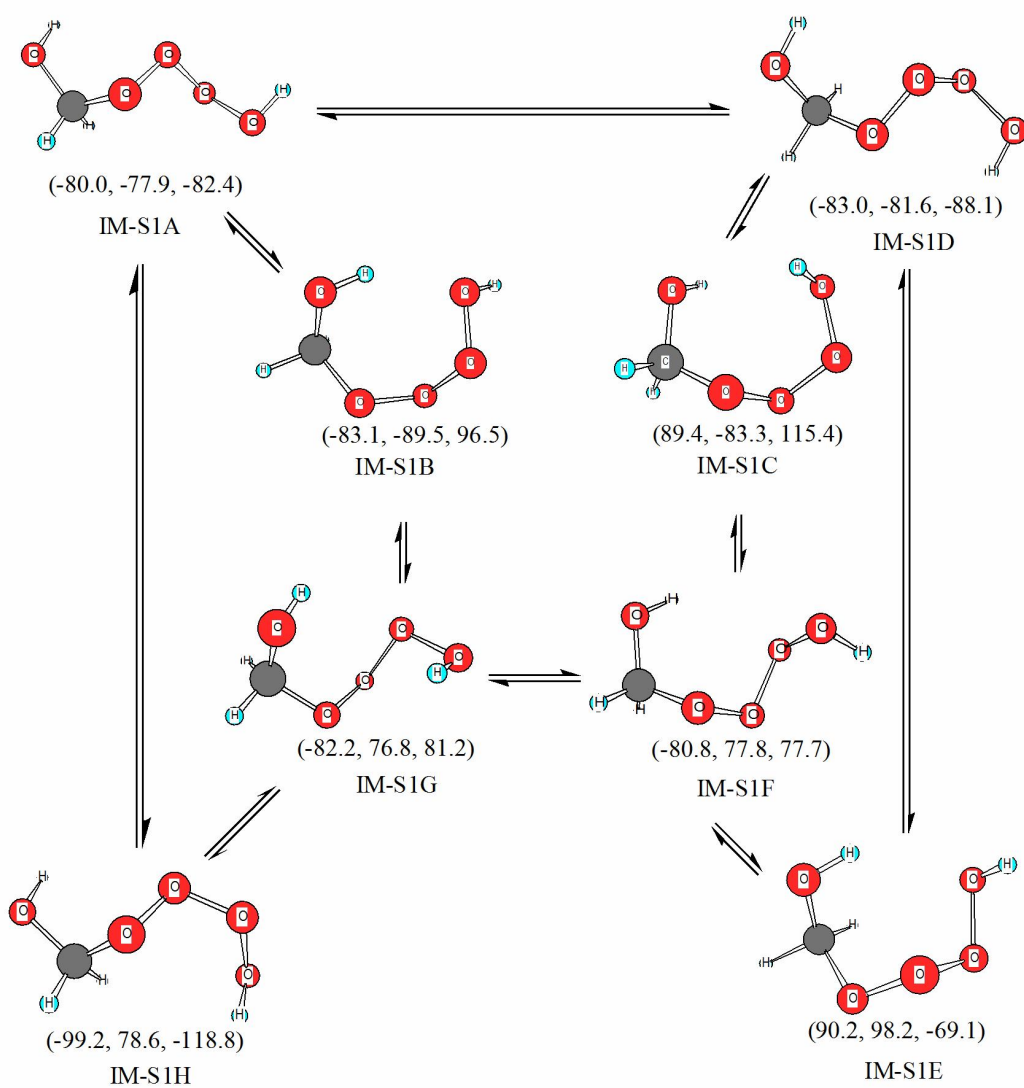

**Figure S2.** The B3LYP/6-311G(d,p) optimized geometries of eight conformations of the singlet HOCH<sub>2</sub>O<sub>4</sub>H intermediate (IM-S1) and the relationship of these conformers. The values in parenthesis are three dihedral angles (in degrees) HOOO, OOOO, and OOOC, respectively.

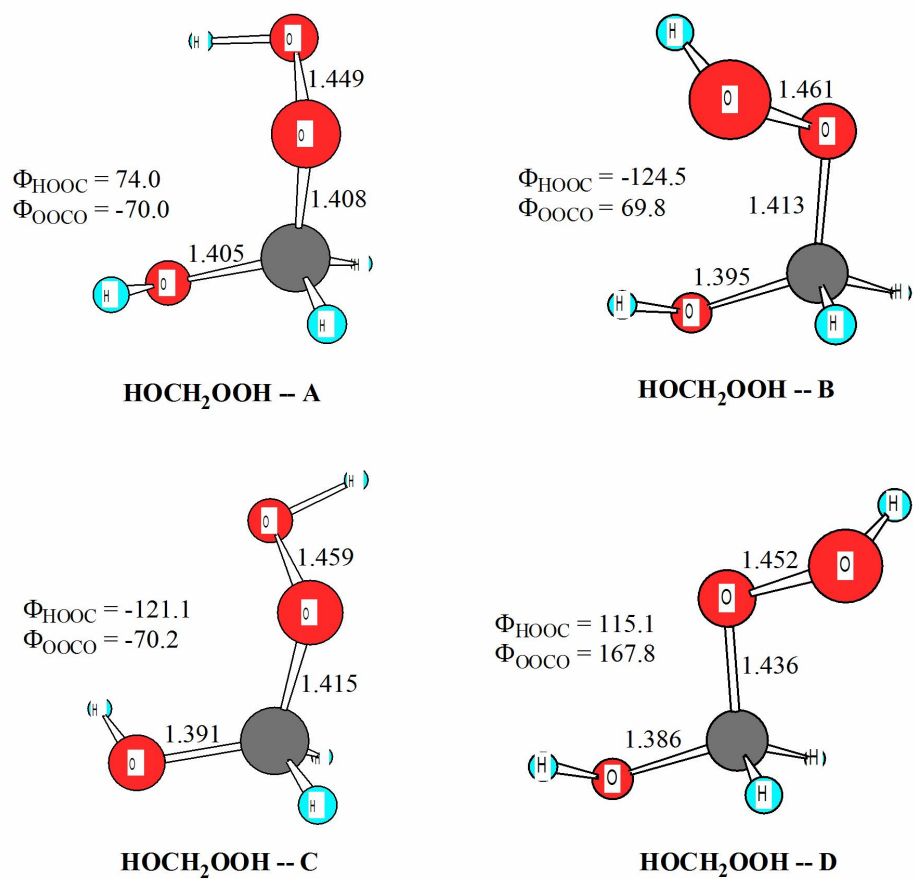

**Figure S3.** The B3LYP/6-311G(d,p) optimized geometries of four conformations of the HOCH<sub>2</sub>OOH molecule. Bond distances are in Å and bond angles are in degrees.

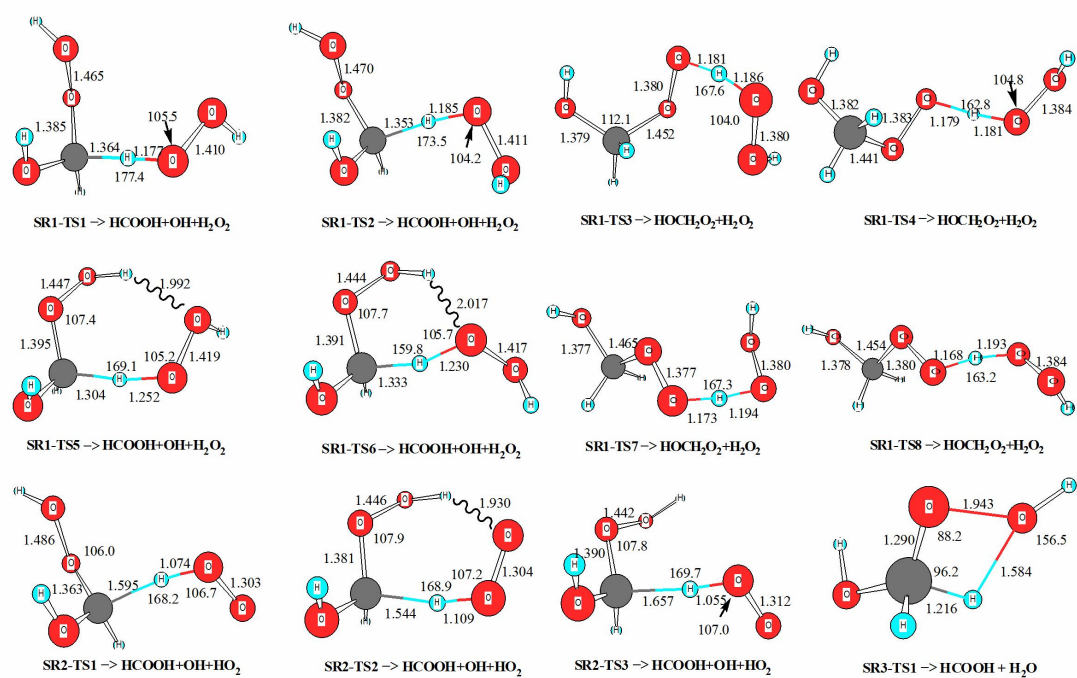

**Figure S4.** The B3LYP/6-311G(d,p) optimized geometries of the transition states involved in the reactions of HOCH<sub>2</sub>OOH with HO<sub>2</sub> (SR1) and O<sub>2</sub> (SR2) reactions. Bond distances are in Å and bond angles are in degrees.

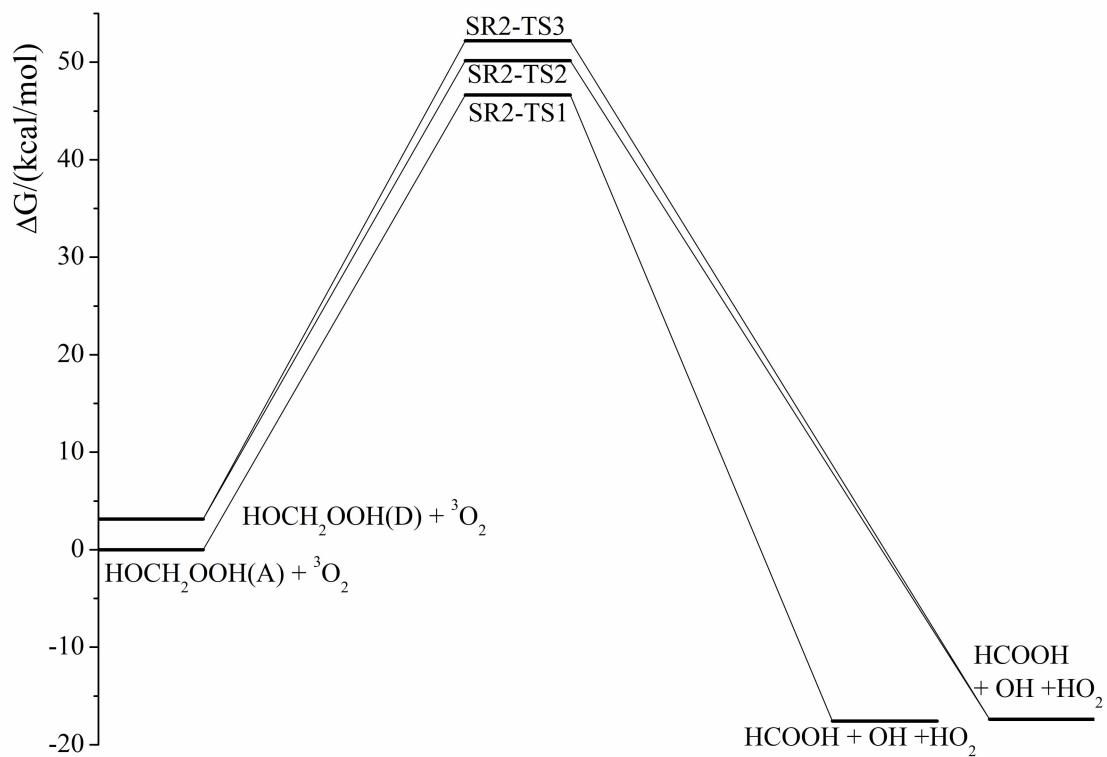

**Figure S5.** Schematic profile for the potential energy surface of the  ${}^3\text{O}_2 + \text{HOCH}_2\text{OOH}$  reaction. The relative energies ( $\Delta G$ , in kcal/mol) at 298.15 K are calculated at the CCSD(T)/CBS//B3LYP/6-311G(d,p) level.

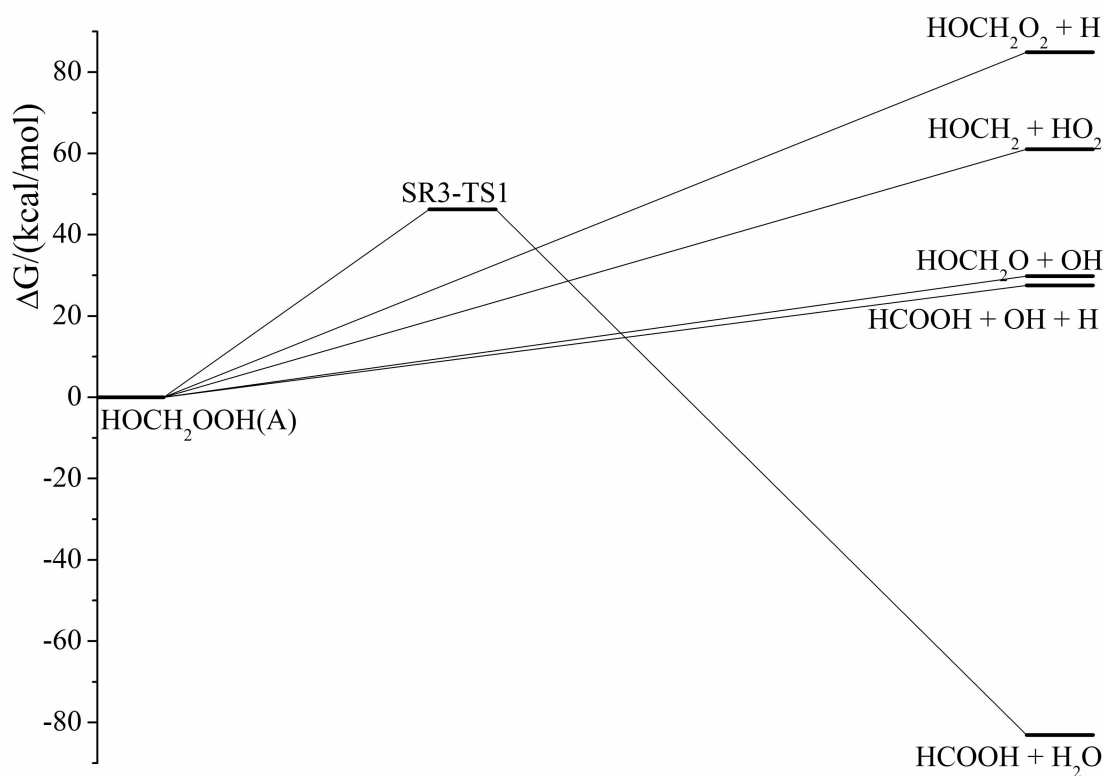

**Figure S6.** Unimolecular decomposition routes of HOCH<sub>2</sub>OOH. The relative energies ( $\Delta G$ , in kcal/mol) at 298.15 K are calculated at the CCSD(T)/CBS // B3LYP/6-311G(d,p) level.

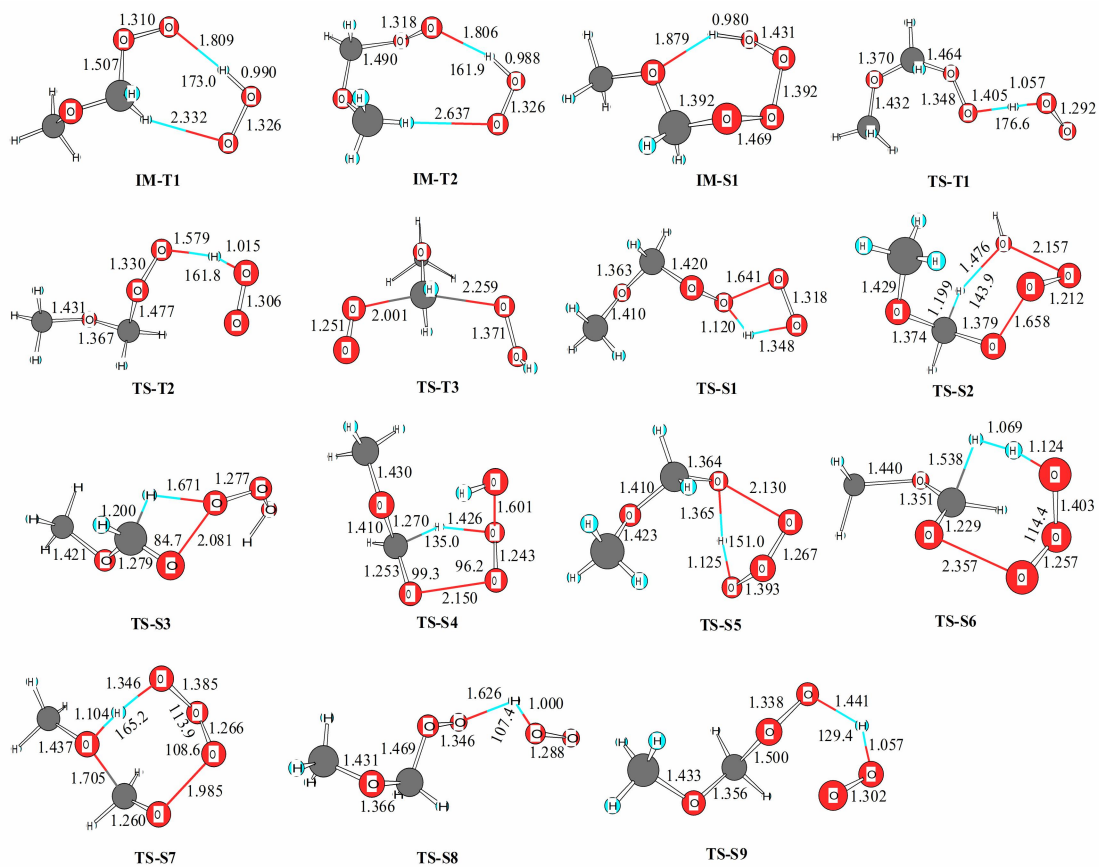

**Figure S7.** The B3LYP/6-311G(d,p) optimized geometries of the intermediates (IM) and transition states (TS) involved in the  $\text{HO}_2 + \text{CH}_3\text{OCH}_2\text{O}_2$  reaction. Bond distances are in Å and bond angles are in degrees.
